# Supplementary material for: A rapid and sensitive p-benzoquinone-mediated bioassay for determination of heavy metal toxicity in water
Source: Royal Society of Chemistry journal article supplement (doi:10.1039/c3an36907b), 2013-01-01
Supplement: c3an36907b.pdf [file c3an36907b.pdf]

## Supporting Information

The concentration of hydroquinone produced by intact cells after incubation can be described by equation (2),

$$C = \int_0^T kC(t)dt \quad (2)$$

where  $C$  is the concentration of hydroquinone,  $T$  is the incubation time,  $k$  is the respiration activity and  $C(t)$  is the concentration of *p-benzoquinone* at time  $t$ . In the presence of  $\text{Cu}^{2+}$ , the respiratory activity is inhibited, and thus the equation (2) can be transformed to equation (3) to describe the concentration of hydroquinone for toxic samples.

$$C_p = \int_0^T k_p C_p(t)dt \quad (3)$$

Where  $C_p$  is the concentration of hydroquinone obtained in the presence of  $\text{Cu}^{2+}$ , and the  $k_p(t)$  is the inhibited respiration activity, and  $C_p(t)$  is the concentration of *p-benzoquinone* at time  $t$ . So the equation (1) can be changed to equation (4)

$$\text{Inhibition \%} = \left(1 - \frac{C_p}{C}\right) \times 100\% = \left(1 - \frac{\int_0^T k_p(t)C_p(t)dt}{\int_0^T kC(t)dt}\right) \times 100\% \quad (4)$$

At low concentration of *p-benzoquinone* and low toxicity, the  $k_p(t)$  can be assumed as a constant during incubation, so the inhibition rate is determined by the changes of concentration of *p-benzoquinone* in the absence and presence of toxicants, and then the equation (4) can be transformed to equation (5),

$$\text{Inhibition \%} = \left(1 - K \frac{\int_0^T C_p(t)dt}{\int_0^T C(t)dt}\right) \times 100\% \quad (5)$$

At the early stage of incubation, the value of  $\int_0^T C_p(t)dt / \int_0^T C(t)dt$  would decrease with time because of the faster increased concentration of hydroquinone (see scheme 1 in the paper) in the absence of toxicants, which results in the increasing inhibition rate.

In the following incubation, the value of  $\int_0^T C_p(t)dt / \int_0^T C(t)dt$  would increase because of the exhaust of *p-benzoquinone* in the absence of toxicants, which is related with the high respiration activity of intact cells and low origin concentration of *p-benzoquinone*. The increased value of  $\int_0^T C_p(t)dt / \int_0^T C(t)dt$  leads to the decreased respiration rate with time. Therefore, for mediated toxicity bioassay, the concentration of mediator and cells, the incubation time can affect the sensitivity of toxicity test.
